# Supplementary material for: Pore engineering of graphene aerogels for vanadium redox flow batteries
Source: Royal Society of Chemistry journal article supplement (doi:10.1039/d0cc06027e), 2020-01-01
Supplement: d0cc06027e1.pdf [file d0cc06027e1.pdf]

Electronic Supplementary Information (ESI)

**Pore Engineering of Graphene Aerogels for Vanadium Redox  
Flow Batteries**

Yang Yang <sup>a,b,c,§</sup>, Wenji Ma <sup>b</sup>, Tong Zhang <sup>a,c</sup>, Dingding Ye <sup>a,c</sup>, Rong Chen <sup>a,c</sup>, Xun  
Zhu <sup>a,c</sup>

<sup>a</sup> Ministry of Education Key Laboratory of Low-grade Energy Utilization Technologies  
and Systems (Chongqing University), Chongqing 400030, China

<sup>b</sup> Research & Development Institute of Northwestern Polytechnical University in  
Shenzhen, School of Mechanical Engineering, Shenzhen 518057, China

<sup>c</sup> Institute of Engineering Thermophysics, Chongqing University, Chongqing 400030,  
China

§ Yang Yang, Ph.D., Corresponding author

E-mail: [yang\\_yang@nwpu.edu.cn](mailto:yang_yang@nwpu.edu.cn)

Address: Institute of Engineering Thermophysics, Chongqing University, Chongqing  
400030, China

Tel/Tax: +86-23-6510-2474

## Materials and Method

### *System*

As showed in Figure S8, the reactant solutions containing  $\text{VO}_2^+/\text{VO}^{2+}$  and  $\text{V}^{3+}$  were obtained *via* the electrolysis of 1.5 M  $\text{VOSO}_4$  in 2 M  $\text{H}_2\text{SO}_4$  in a standard electrolytic cell.<sup>S1</sup> The external current was fixed on 40 mA  $\text{cm}^{-2}$ . To fabricate the reactor, the positive (*i.e.* Pt plate) and negative electrode (*i.e.* PEGA) were separated by a proton exchange membrane (PEM, Nafion 117) in two chambers, as showed in Figure S9. 1.5 M  $\text{VOSO}_4$  diluted in 2 M  $\text{H}_2\text{SO}_4$  has been typically chosen as the fuel/electrolyte by previous reports. The active vanadium concentration in sulfuric-acid-based VRB is typically lower than 1.7 M due to the poor solubility and stability under high vanadium ion concentration.

### *Physical characterization*

The surface morphology, microstructure and crystal phase composition were characterized by scanning electron microscopy equipped with energy disperse spectroscopy (SEM-EDS, VEGA 3LMU, TESCAN), transmission electron microscope (TEM, JEOL2010, Japan) and X-ray diffraction (XRD, Brucker D8, Germany). X-ray diffraction (XRD, Brucker D8, Germany) was carried out using Cu radiation with a  $2\theta$ -angle range of  $15^\circ\sim 60^\circ$  and a step size of  $0.02^\circ$ . The Raman spectra were collected with Raman spectrometer (Reinshaw Raman, 633 nm). The average pore diameter and pore distribution were calculated from adsorption branch by Barrett-Joyner-Halenda (BJH)

model, and the Brunauer-Emmett-Teller (BET) specific surface area and pore characteristics were determined from the N<sub>2</sub> adsorption-desorption measurement data over the relative pressure ( $P/P_0$ ) (ASAP 2460, Micromeritics Inc., GA). The micropore surface area, rather than the number of micropore, was evaluated from *t-plot* theory rather than BJH adsorption model. The BJH model was not suitable for analysing the small pores (<10 nm) especially for micropores (<2 nm), because the strong interaction between the neighbouring micropore-wall made the Kelvin equation not suitable anymore.

### ***Electrochemical characterization***

Cyclic voltammetry (CV) and electrochemical impedance spectroscopy (EIS) measurements were conducted using a CHI 660E electrochemical workstation (CHI Instruments Inc.). A three-electrode system was used, where PEGAs that served as the working electrode (WE), commercial platinum foam and Ag/AgCl [sat. KCl solution, +0.197 V *vs.* standard hydrogen electrode (SHE)] as the counter electrode (CE) and reference electrode (RE), respectively. The measurement was carried out in the aqueous solution of 1.5 M VOSO<sub>4</sub>/2 M H<sub>2</sub>SO<sub>4</sub>. CV was scanned from 0.2 V to 2.1 V at the scan rate of 10 mV s<sup>-1</sup>. The complete one-cycle charging-discharging property was characterized at a constant current density of 25 mA cm<sup>-2</sup> by setting the voltage upper limit (charging) and voltage lower limit (discharging).<sup>S2, S3</sup> The variation of OCP (*vs.* time) was obtained under the low state of charge (*i.e.* 10% of state of charge). EIS test

was performed from 1 Hz to 100 kHz at 0 V. The energy efficiency ( $EE$ ) could be calculated as the following equation (Eq. S1):

$$EE(\%) = \frac{\text{discharge energy}}{\text{charge energy}} \times 100\% = \frac{\int V_d I_d dt}{\int V_c I_c dt} \times 100\%$$

S1

Where  $V_d$  is the discharging voltage,  $V_c$  charging voltage,  $I_d$  discharging current,  $I_c$  charging current and  $t$  indicates corresponding time. The specific capacity ( $C$ ) was calculated using the following equation (Eq. S2):

$$C = I_d \cdot t / w \quad S2$$

Where  $w$  is the electrode weight.

## Supplementary Figures and Tables

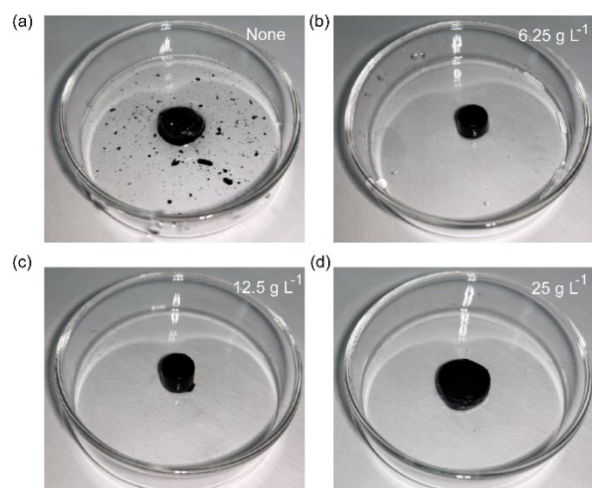

Fig. S1. (a-d) Optical images of GA, PEGA-6.25, PEGA-12.5 and PEGA-25.

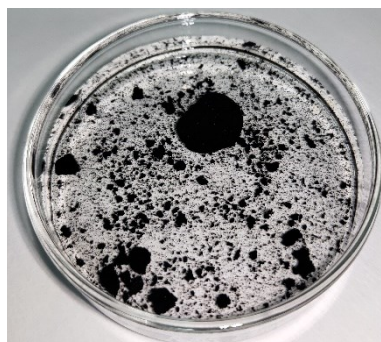

Fig. S2. Optical images of PEGA with the NaNO<sub>3</sub> content of 37.5 g L<sup>-1</sup>.

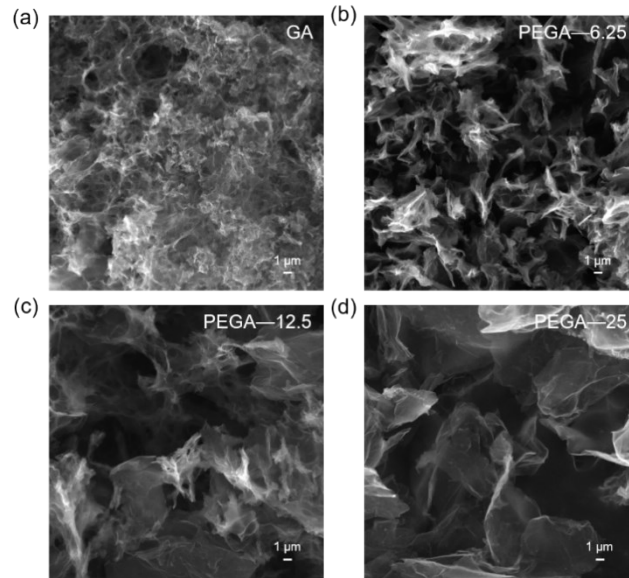

Fig. S3. Enlarged SEM images showing the porous structure of (a) GA and (b-d) PEGA with different porogen contents.

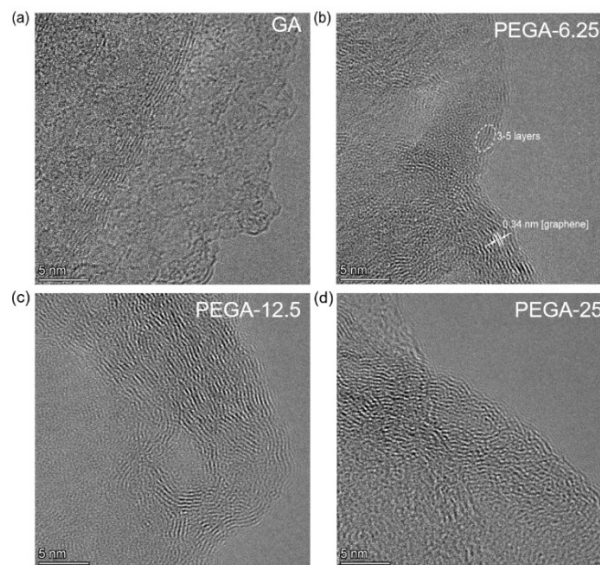

Fig.S4. TEM image showing the morphologies of (a) GA and (b-d) PEGA with different porogen contents. TEM image showing the mono-layer structure (3~5 layers) and layer space (~0.34 nm).

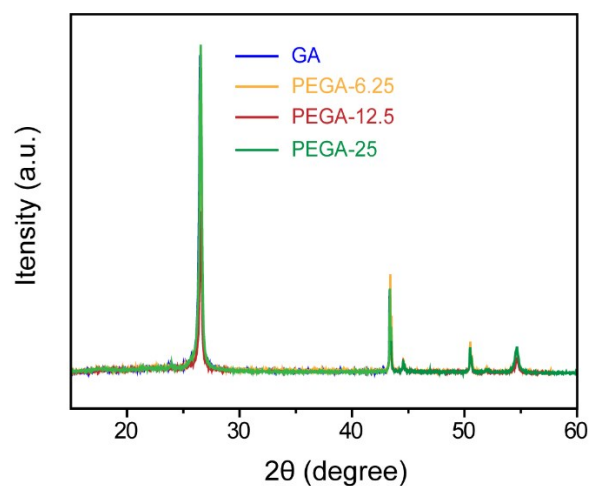

Fig.S5. XRD patterns of GA and PEGAs.

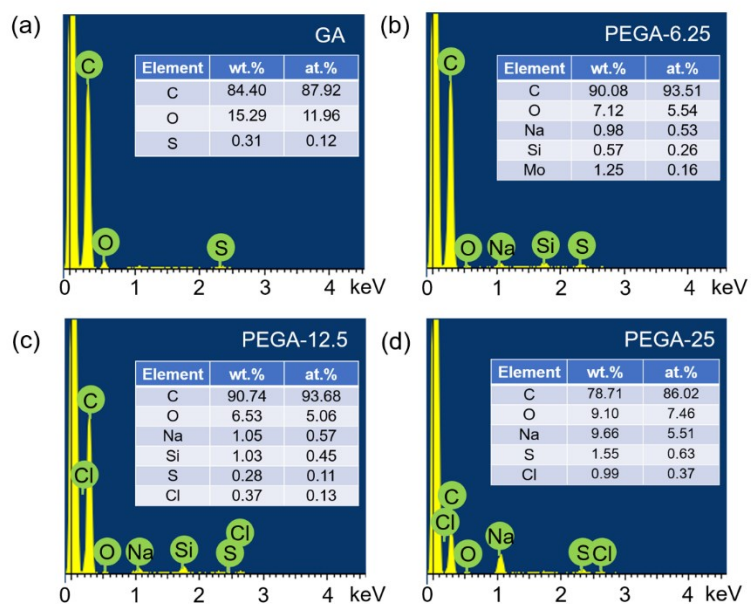

Fig.S6. EDS mapping of GA and PEGAs. Inset table summarizes the elementary contents.

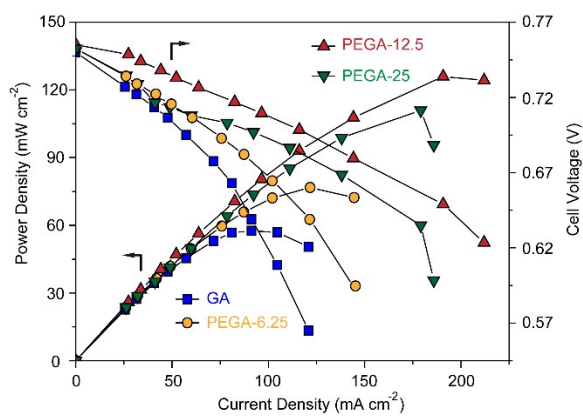

Fig. S7. Polarization and power density curves collected from VFB with GA, PEGA-6.25, PEGA-12.5 and PEGA-25.

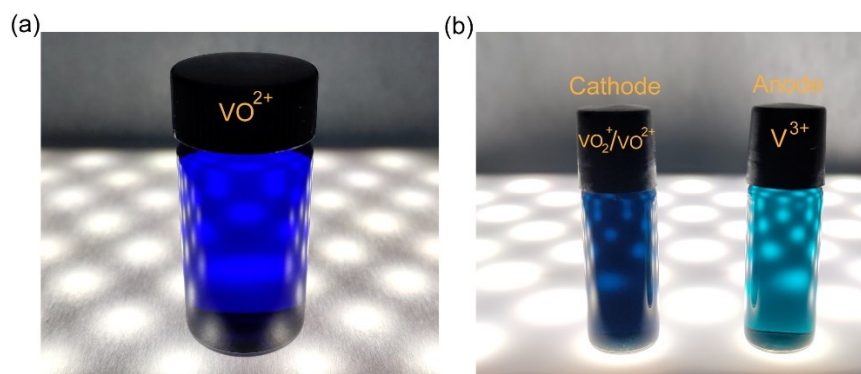

Fig.S8. Optical images of (a)  $\text{VO}^{2+}$  and (b)  $\text{VO}_2^+/\text{VO}^{2+}$  (cathode side) and  $\text{V}^{3+}$  (anode side).

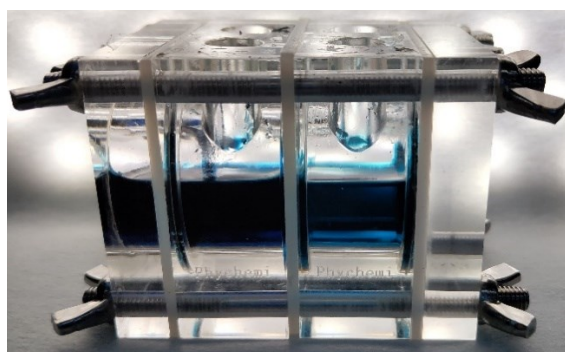

Fig.S9. Schematic illustration of VRB device with the lab-scale.

**Table S1.** Pore-characters of GA and PEGA with different porogen.

| Property                                                                           | GA    | PEGA-6.25 | PEGA-12.5 | PEGA-25 |
|------------------------------------------------------------------------------------|-------|-----------|-----------|---------|
| <i>BET surface area (<math>\text{m}^2 \text{g}^{-1}</math>)</i>                    | 34.3  | 156.9     | 207.4     | 273.5   |
| <i>Average pore size (nm)</i>                                                      | 41.2  | 5.4       | 3.7       | 2.9     |
| <i>Cumulative pore volume (<math>\text{cm}^3 \text{g}^{-1}</math>)<sup>a</sup></i> | 0.046 | 0.13      | 0.09      | 0.082   |
| <i>Micropore surface area (<math>\text{m}^2 \text{g}^{-1}</math>)<sup>b</sup></i>  | 64.4  | 67.4      | 148.3     | 122.6   |

Note: a. Total pore volume; b. t-plot micropore surface area.

**Table S2.** Parameters and performances of recently typical graphene-based electrodes in the VFB applications.

| Catalyst@Electrode | Cut-off | Energy Efficiency | Specific | Specific | Ref. |
|--------------------|---------|-------------------|----------|----------|------|
|--------------------|---------|-------------------|----------|----------|------|



|                                         | Potential<br>(V) | (100%)     | Capacity<br>(Ah L <sup>-1</sup> ) | Capacity<br>(mAh g <sup>-1</sup> ) |                  |
|-----------------------------------------|------------------|------------|-----------------------------------|------------------------------------|------------------|
| <b>Pore-engineered graphene aerogel</b> | <b>0.3~2.2</b>   | <b>85%</b> | <b>5.6</b>                        | <b>163.4</b>                       | <b>This work</b> |
| Graphene gelatum /graphite plate        | 0.75~1.65        | 82.6%      | ~                                 | ~                                  | S4               |
| Phosphonated graphene oxide             | 0.8~1.72         | 80.2%      | ~                                 | ~                                  | S5               |
| Orientated graphene oxide/Nafion        | 0.8~1.65         | 81.5-88.4% | ~                                 | ~                                  | S6               |
| Graphene-modified carbon felt           | 0.8~1.6          | 83.3       | 10.9 <sup>a</sup>                 | ~                                  | S7               |
| Electro                                 | 0.7~1.72         | 82%        | 17.5 <sup>b</sup>                 | 116.6 <sup>b</sup>                 | S8               |

Note: a. The value was collected at 1.6 M V<sup>3.5+</sup> solution; b. The value was calculated based on the electrode area (1×1 cm<sup>2</sup>).

### Supporting References

- S1. W. Li, J. Liu and C. Yan, *Carbon*, 2013, **55**, 313-320.
- S2. L. Yu, F. Lin, W. Xiao, L. Xu and J. Xi, *Chem. Eng. J.*, 2019, **356**, 622-631.
- S3. M. Jiao, T. Liu, C. Chen, M. Yue, G. Pastel, Y. Yao, H. Xie, W. Gan, A. Gong, X. Li and L. Hu, *Energy Storage Mater.*, 2020, **27**, 327-332.
- S4. M. Jing, C. Zhang, X. Qi, Y. Yang, J. Liu, X. Fan, C. Yan and D. Fang, *Int. J. Hydrogen Energy*, 2020, **45**, 916-923.
- S5. M. Etesami, E. Abouzari-Lotf, A. Ripin, M. M. Nasef, T. M. Ting, A. Saharkhiz and A. Ahmad, *Int. J. Hydrogen Energy*, 2018, **43**, 189-197.
- S6. L. Su, D. Zhang, S. Peng, X. Wu, Y. Luo and G. He, *Int. J. Hydrogen Energy*, 2017, **42**, 21806-816.
- S7. D. O. Opar, R. Nankya, J. Lee and H. Jung, *Electrochim. Acta*, 2020, **330**, 135276.
- S8. P. M. Nia, E. Abouzari-Lotf, P. M. Woi, Y. Alias, T. M. Ting, A. Ahmad and N. W. Che Jusoh, *Electrochim. Acta*, 2018, **297**, 31-39.
- S9. M. Park, Y. Jung, J. Kim, H. Lee and J. Cho, *Nano Lett.*, 2013, **13**, 4833-4839.
- S10. H. Zhang, J. Wang, Q. Liu, W. He, Z. Lai, X. Zhang, M. Yu, Y. Tong and X. Lu, *Energy Storage Mater.*, 2019, **21**, 154-161.
- S11. M. S. Balogun, M. Yu, Y. Huang, L. Cheng, P. Fang, L. Yi, X. Lu and Y. Tong, *Nano Energy*, 2015, **11**, 348-355.
- S12. A. Slesarenko, I. K. Yakuschenko, V. Ramezankhani, V. Sivasankaran, O. Romanyuk, A.V. Mumyatov, I. Zhidkov, S. Tsarev, E. Z. Kurmaev, A. F. Shestakov, O. V. Yarmolenko, K. J. Stevenson and P. A. Troshin, *J. Power Sources*, 2019, **435**, 226724.

- S13. J. Cao, F. Ding, H. Chen, H. Wang, W. Wang, Z. Chen and J. Xu, *J. Power Sources*. 2019, **423**, 316-22
- S14. H. Saneifar, N. Delaporte, G. Shul and D. Bélanger, *Mater. Chem. Phys.*, 2019, **235**, 121739.
- S15. J. Li, Z. Guo, C. Deng, Y. Gu, M. Xie, R. Xiong, Y. Xue, H. Zhao, K. Scott and X. Wu, *J. Energy Storage*, 2019, **26**, 100832.
- S16. J. Lang, K. Liu, Y. Jin, Y. Long, L. Qi, H. Wu and Y. Cui, *Energy Storage Mater.*, 2020, **20**, 412-416.
- S17. L. Liu, L. Yang, M. Liu, X. Wang, X. Li, D. Shao, K. Luo, Z. Luo and G. Chen, *J. Energy Storage*, 2019, **25**, 100886.
